# Supplementary material for: Inhibition of CXXC5 function reverses obesity‐related metabolic diseases
Source: PubMed Central journal article supplement (PMC8982507; doi:10.1002/ctm2.742), 2022-04-05
Supplement: CTM2-12-e742-s001.pdf [file CTM2-12-e742-s001.pdf]

# 1 Supplementary Information

Fig. S1

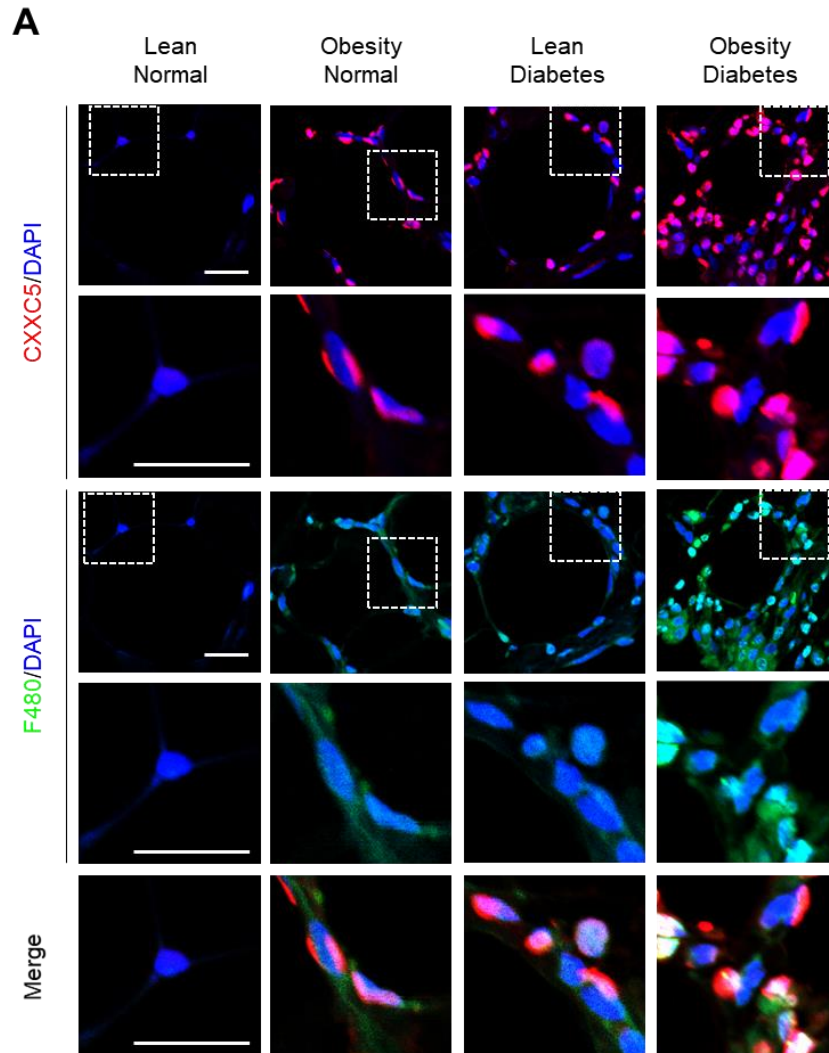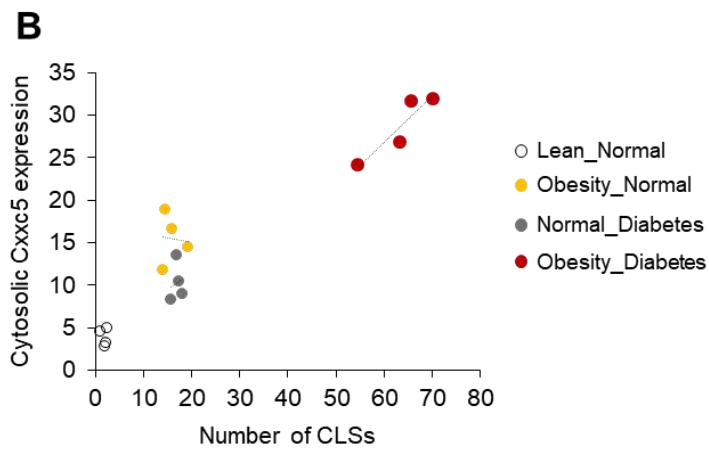

3 **Figure S1. CXXC5 is expressed in F4/80 positive CLSs.** Visceral adipose tissues from human  
4 subjects that were lean, obese, diabetic, and obese-diabetic ( $n = 4$  per group). **(A)**  
5 Representative IHC images of CXXC5 and F4/80 in visceral adipose tissue. **(B)** The correlation  
6 of cytosolic CXXC5 expression with the number of CLSs. Scale bars = 100  $\mu\text{m}$ .

7

8

9

10

11

12

13

14

15

16

17

18

19

20

21

22

23

24

25

Fig. S2

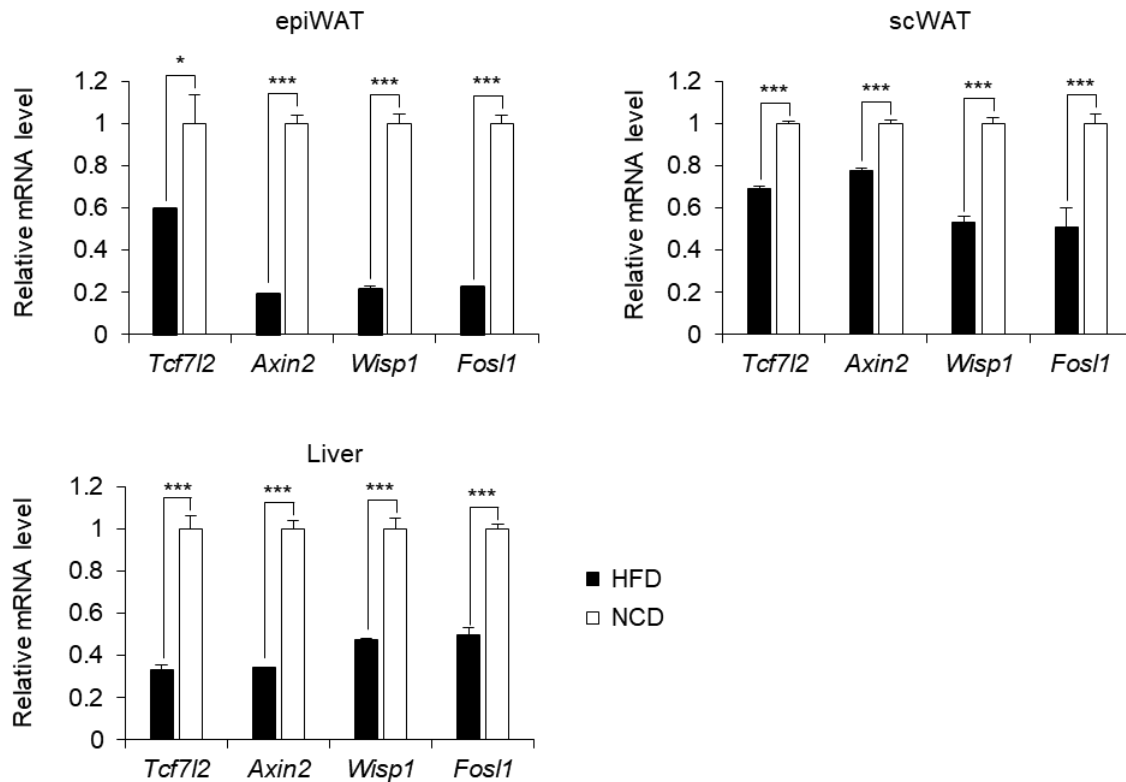

26

27 **Figure S2. Analyses of the expression levels of Wnt/ $\beta$ -catenin signaling target genes in**

28 **insulin sensitive tissues.** *Cx3c5*<sup>+/+</sup> mice fed HFD or NCD for 8 weeks ( $n = 6$  per group).

29 Relative mRNA expression levels of Wnt/ $\beta$ -catenin signaling target genes (*Tcf7l2*, *Axin2*,

30 *Wisp1*, and *Fosl1*) in epiWAT, scWAT, and liver. Expression levels of mRNA were normalized

31 by HFD-fed group. All data are presented as the mean  $\pm$  SD. \* $P < 0.05$ , \*\* $P < 0.01$ , \*\*\* $P <$

32 0.001 determined by Student's *t*-test.

33

Fig. S3

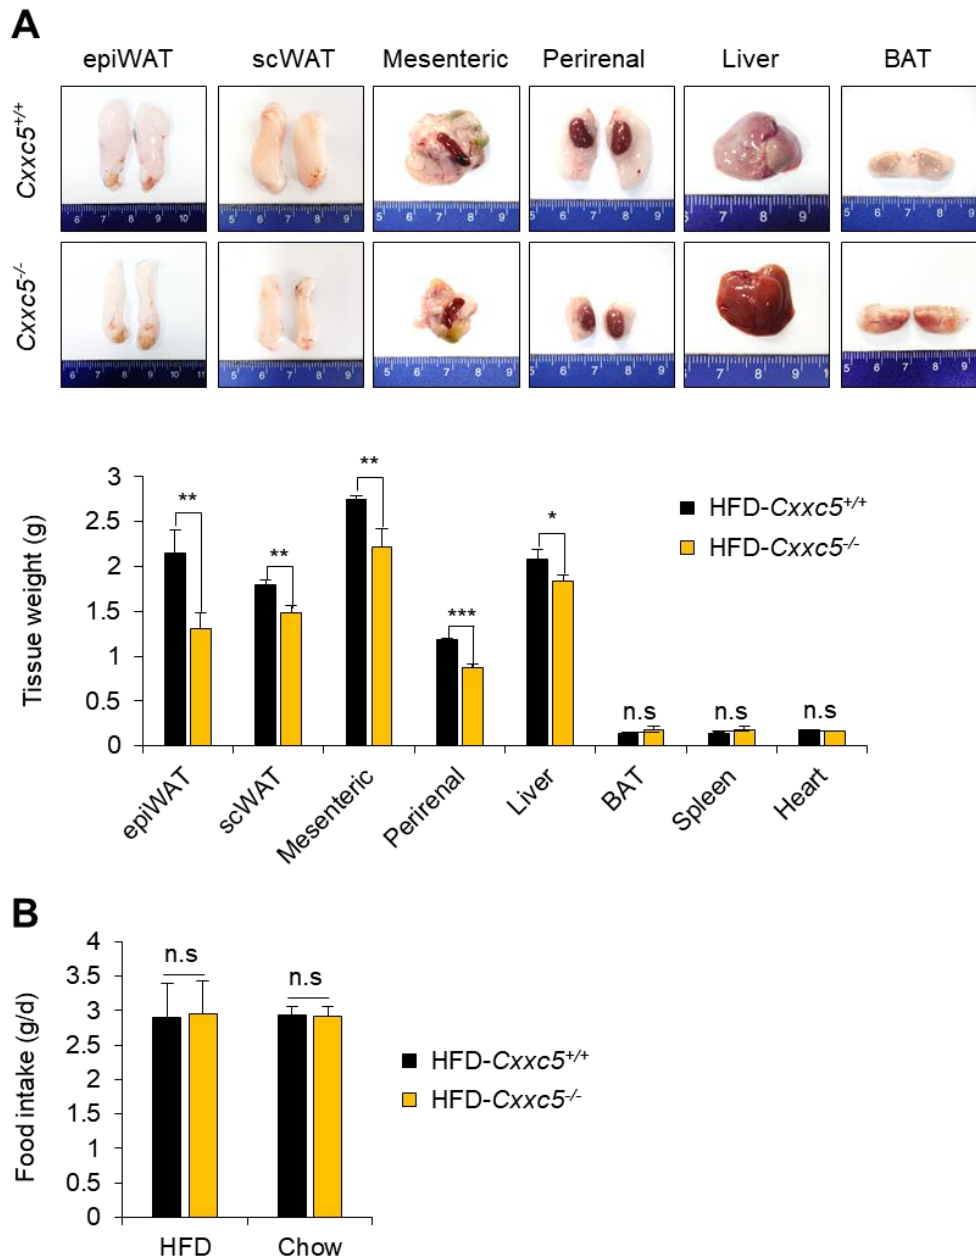

34

35 **Figure S3. Ablation of *Cxhc5* resists obesity without differences in food intake.** *Cxhc5*<sup>+/+</sup>  
36 and *Cxhc5*<sup>-/-</sup> mice fed HFD for 8 weeks ( $n = 9-13$  per group). (A) Representative photographs  
37 (upper panel) and wet weight of epiWAT, scWAT, mesenteric, perirenal, liver, BAT, spleen, and  
38 heart (lower panel). (B) Daily food intake during all study weeks. All data are presented as the  
39 mean  $\pm$  SD. \* $P < 0.05$ , \*\* $P < 0.01$ , \*\*\* $P < 0.001$  determined by Student's *t*-test.

Fig. S4

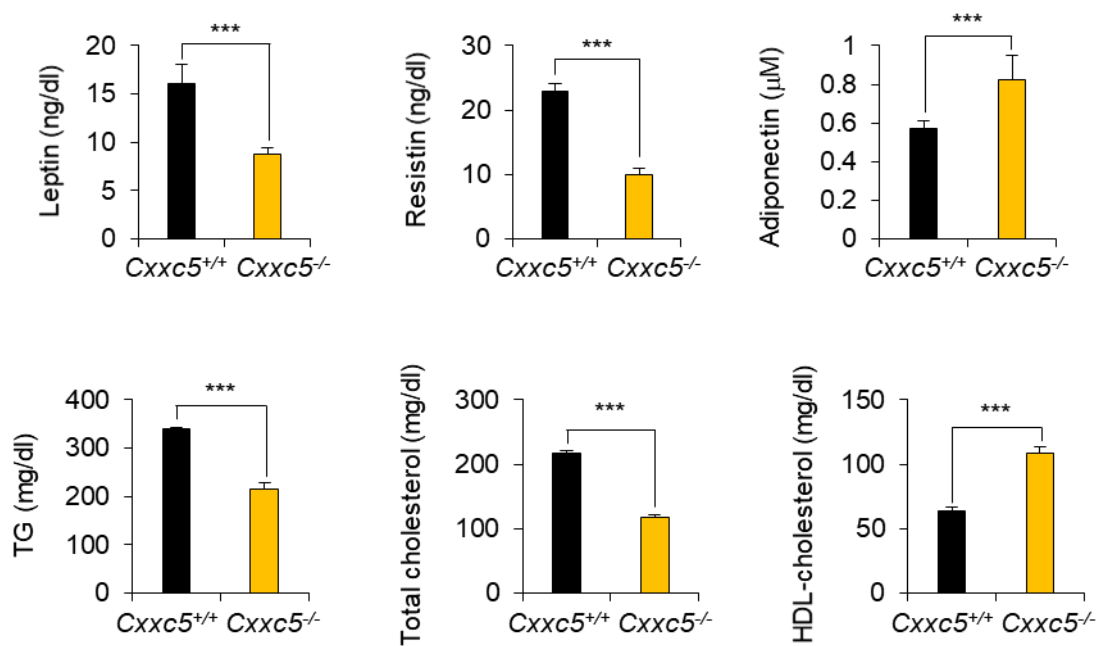

40

41 **Figure S4. Ablation of *Cxhc5* improves metabolic parameters.** *Cxhc5*<sup>+/+</sup> and *Cxhc5*<sup>-/-</sup> mice  
42 were fed HFD for 8 weeks ( $n = 9-13$  per group). Plasma concentration or relative levels of  
43 leptin, resistin, adiponectin, TGs, total cholesterol, and HDL-cholesterol after overnight fasting.  
44 All data are presented as the mean  $\pm$  SD. \*\*\* $P < 0.001$  determined by Student's  $t$ -test.

45

46

47

48

49

50

51

52

53

**Fig. S5**

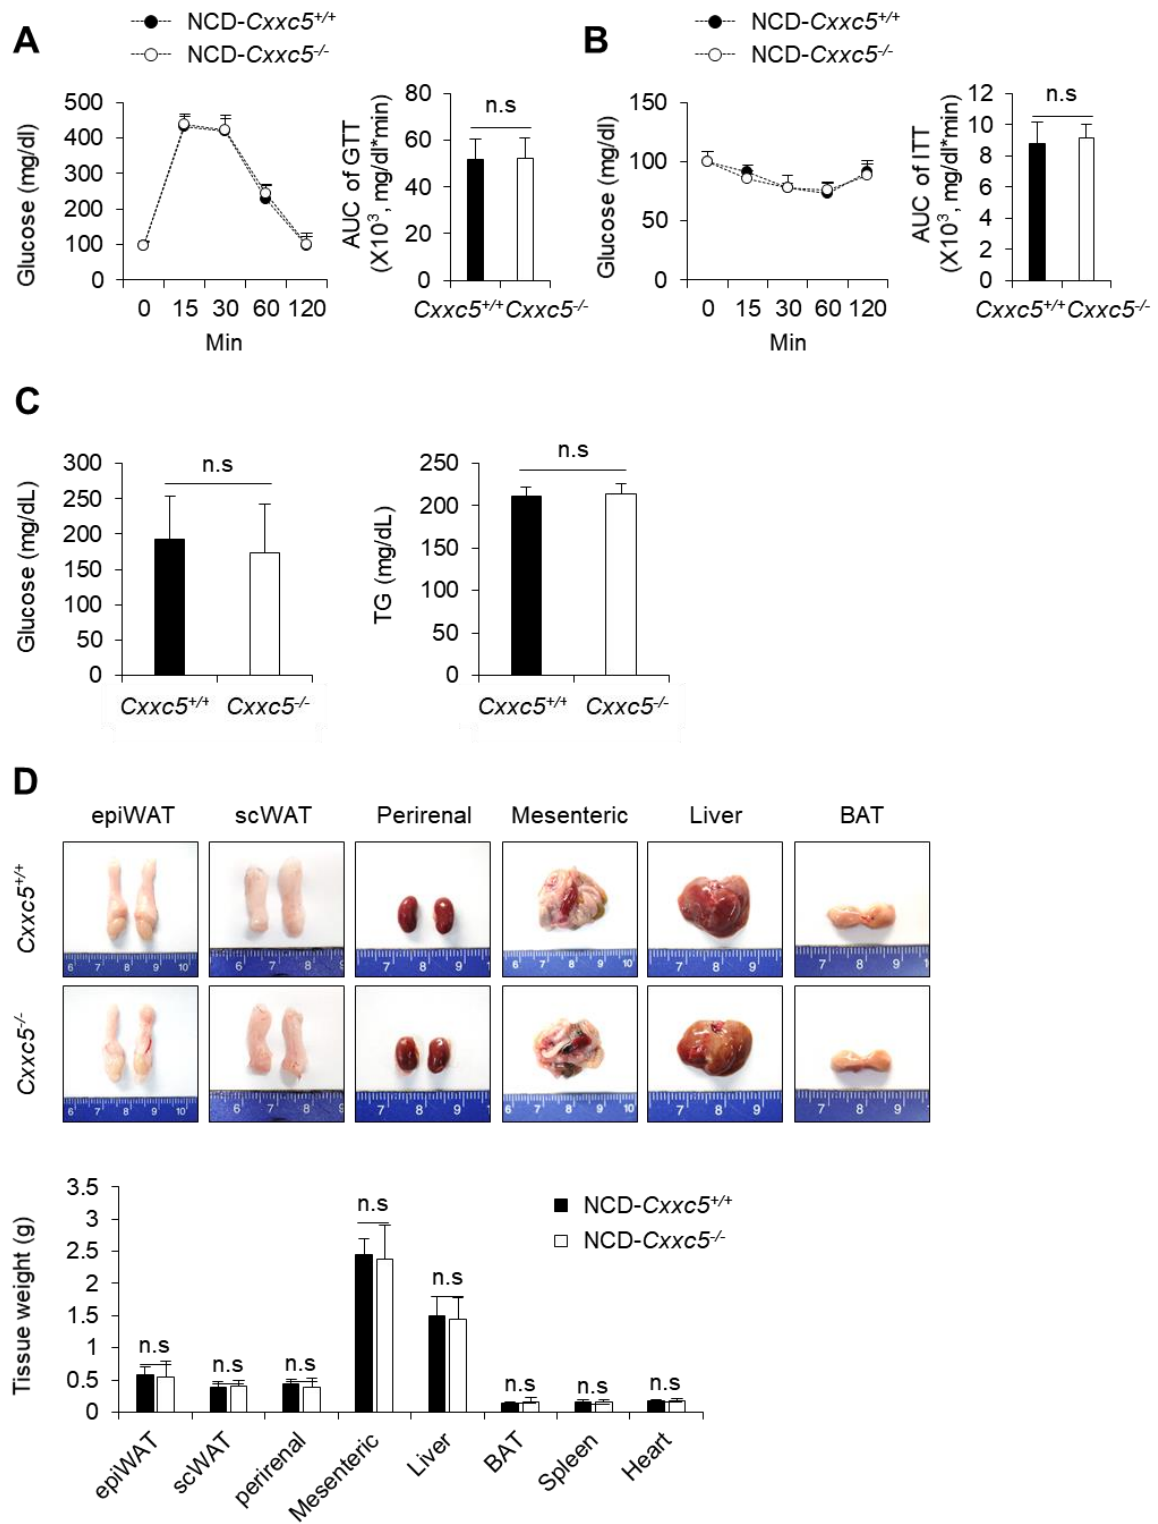

54

55

56 **Figure S5. Ablation of *Cx3c5* has no metabolic effects on mice fed NCD. *Cx3c5*<sup>+/+</sup> and**  
57 ***Cx3c5*<sup>-/-</sup> mice were fed NCD for 8 weeks (*n* = 9–12 per group). (A) Glucose tolerance test and**  
58 **AUC. (B) Insulin tolerance test and AUC. (C) Plasma concentration of glucose and TGs. (D)**  
59 **Representative photographs (upper panel) and wet weight of epiWAT, scWAT, perirenal,**  
60 **mesenteric, liver, BAT, spleen, and heart (lower panel). All data are presented as the mean ±**  
61 **SD. Statistical analysis was determined by Student's *t*-test.**

62

63

64

65

66

67

68

69

70

71

72

73

74

75

76

77

78

Fig. S6

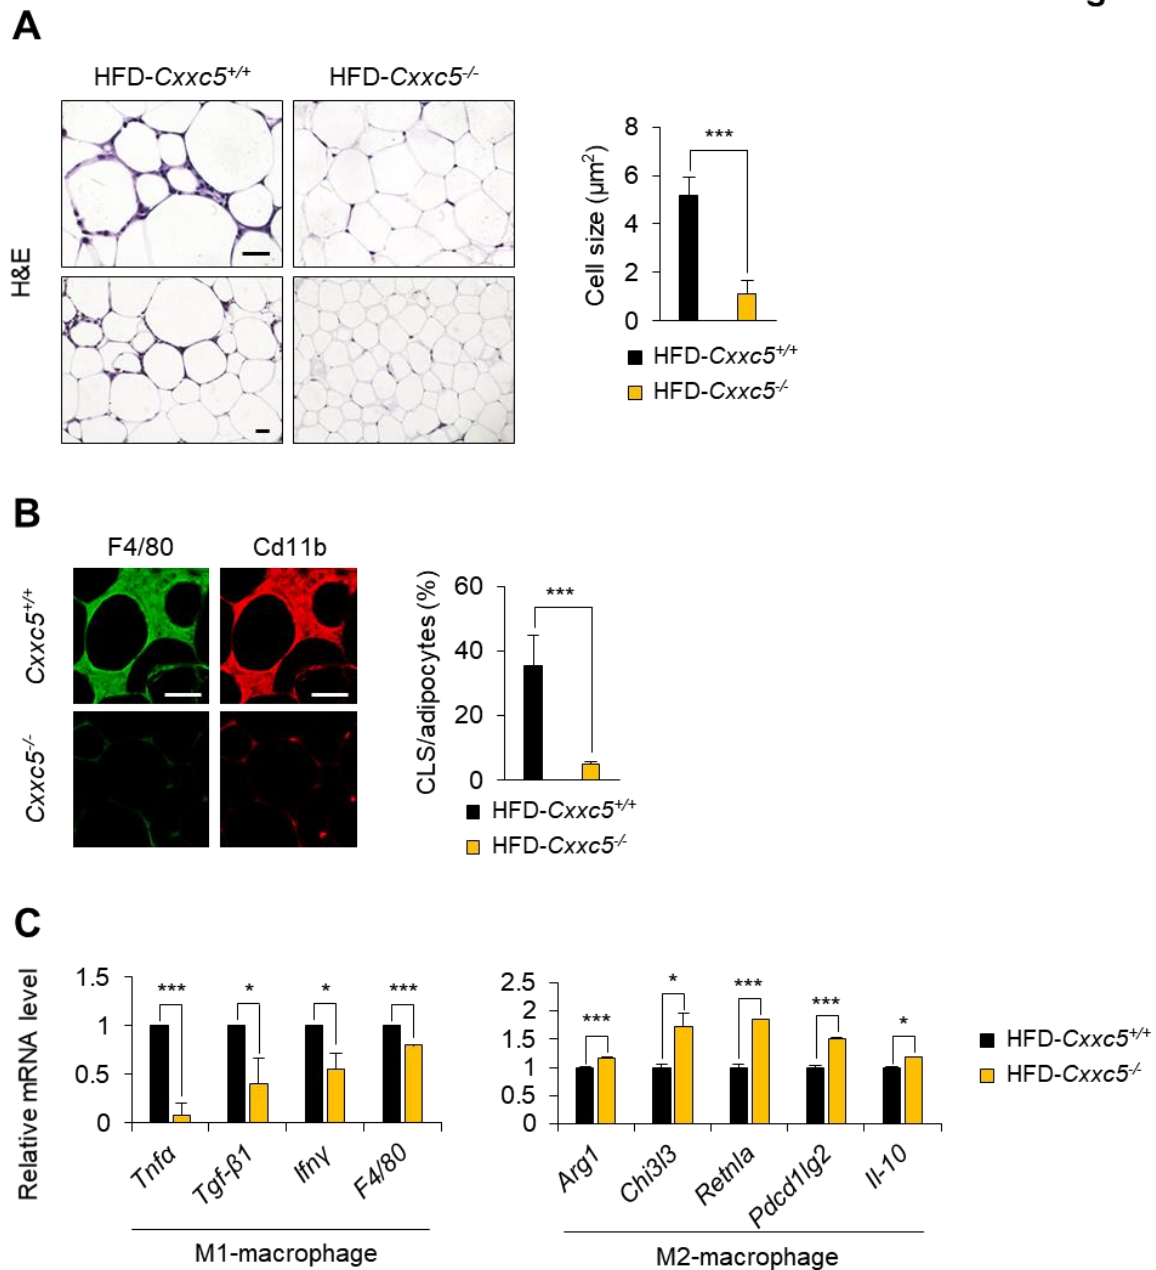

79

80 **Figure S6. Ablation of *Cxhc5* resists hypertrophy of adipose tissue with modulation of M1**  
81 **and M2 macrophage markers.** epiWAT from *Cxhc5*<sup>+/+</sup> and *Cxhc5*<sup>-/-</sup> mice fed HFD for 8 weeks  
82 ( $n = 9-13$  per group). (A) Representative images of H&E staining (left panel). Quantitative  
83 analyses of adipocyte cell size (right panel). (B) Representative IHC images for F4/80 and  
84 Cd11b (left panel) and the percentage of crown-like structures (CLSs) per adipocyte on



85 histological sections (right panel). (C) Relative expression levels of marker genes for M1 and  
86 M2 macrophages. Expression levels of mRNA were normalized by HFD-fed *Cx3c5*<sup>+/+</sup> mice  
87 group. All data are presented as the mean ± SD. \**P* < 0.05, \*\**P* < 0.01, \*\*\**P* < 0.001  
88 determined by Student's *t*-test.

89

90

91

92

93

94

95

96

97

98

99

100

101

102

103

104

105

106

107

108

**Fig. S7**

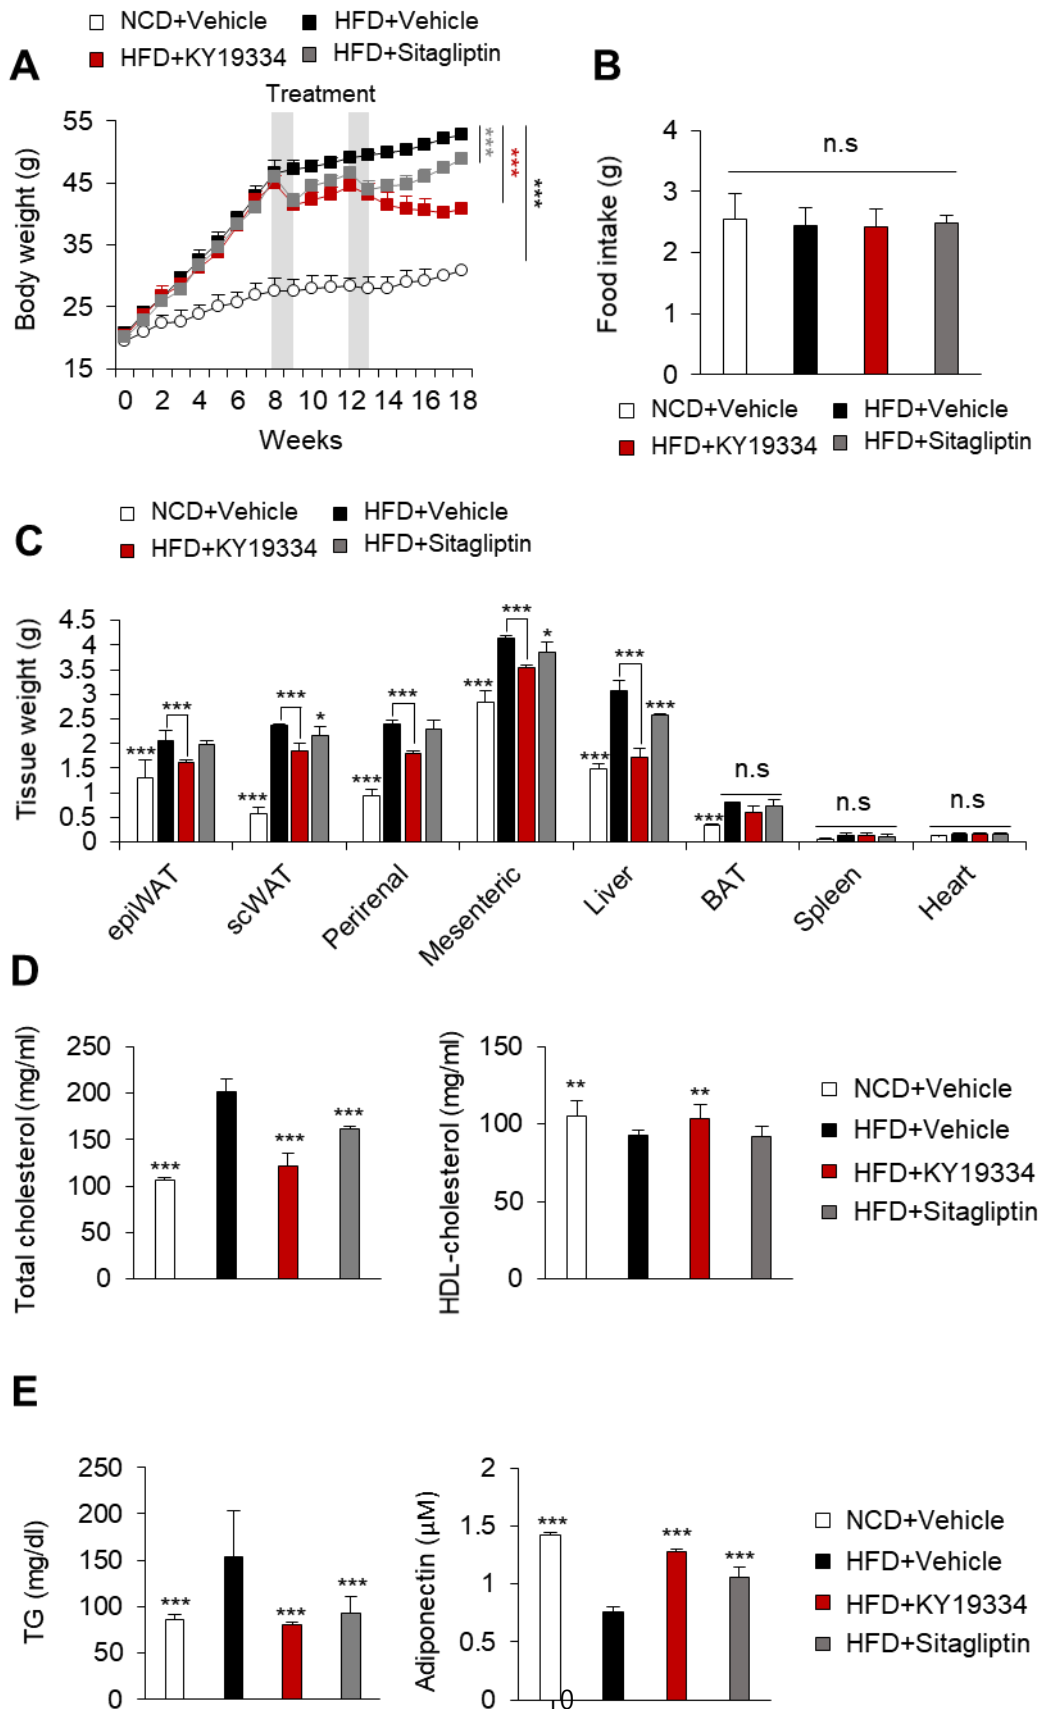

110 **Figure S7. Relative effectiveness of KY19334 and sitagliptin on diet-induced obesity.**  
111 C57BL/6 mice fed NCD or HFD for 18 weeks were p.o. administered KY19334 (25 mg/kg/d),  
112 sitagliptin (50 mg/kg/d) for 5 days on weeks 8 and 12 ( $n = 10$  per group). **(A)** Body weight  
113 changes. **(B)** Daily food intake during all study wks. **(C)** Wet weight of epiWAT, scWAT,  
114 perirenal, mesenteric, liver, BAT, spleen, and heart. **(D, E)** Plasma concentration after overnight  
115 fasting. Total cholesterol and HDL-cholesterol **(D)**, TGs, and adiponectin **(E)**. All data are  
116 presented as the mean  $\pm$  SD. \* $P < 0.05$ , \*\*\* $P < 0.001$  determined by Student's  $t$ -test.

117

118

119

120

121

122

123

124

125

126

127

128

129

130

131

132

**Fig. S8**

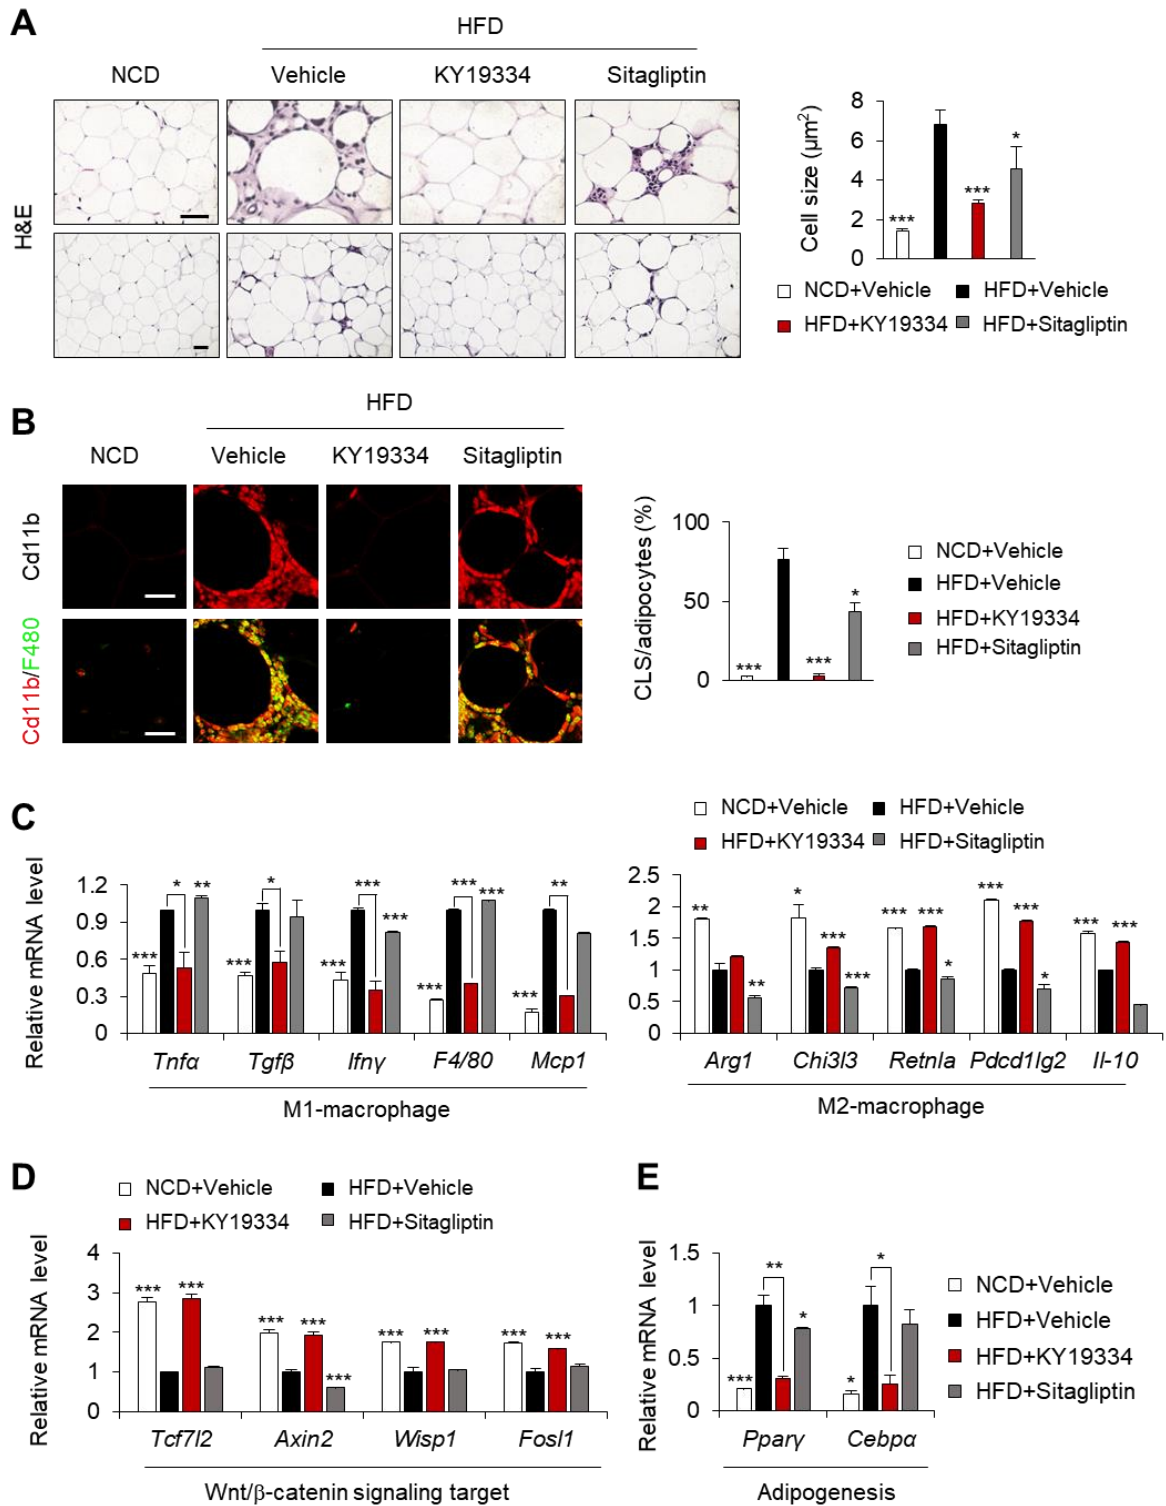

133

134

135

136 **Figure S8. KY19334 induces adipose tissue remodeling involving improvement**  
137 **inflammation and adipogenesis.** C57BL/6 mice fed NCD or HFD for 18 weeks were p.o.  
138 administered KY19334 (25 mg/kg/d) or sitagliptin (50 mg/kg/d) for 5 days on weeks 8 and 12  
139 ( $n = 10$  per group). **(A)** Representative images of H&E staining of epiWAT (left panel) and  
140 quantitative analyses of adipocyte cell size of epiWAT (right panel). **(B)** Representative IHC  
141 images ( $n = 5$  independent experiments) for F4/80 and Cd11b (left panel) and the percentage  
142 of crown-like structures (CLSs) per adipocytes on histological sections (right panel). **(C)** Flow  
143 cytometry analysis of the expression of F4/80 and Cd11b and percentage of F4/80<sup>+</sup>Cd11b<sup>+</sup> cells  
144 are shown. **(D-F)** Relative mRNA expression of M1 and M2 macrophage markers **(D)**, Wnt/ $\beta$ -  
145 catenin signaling target **(E)**, and adipogenesis **(F)** genes. Expression levels of mRNA were  
146 normalized by vehicle-treated HFD mice group. Scale bars = 100  $\mu$ m. All data are presented  
147 as the mean  $\pm$  SD. \* $P < 0.05$ , \*\* $P < 0.01$ , \*\*\* $P < 0.001$  determined by Student's  $t$ -test.

148  
149  
150  
151  
152  
153  
154  
155  
156  
157  
158  
159

Fig. S9

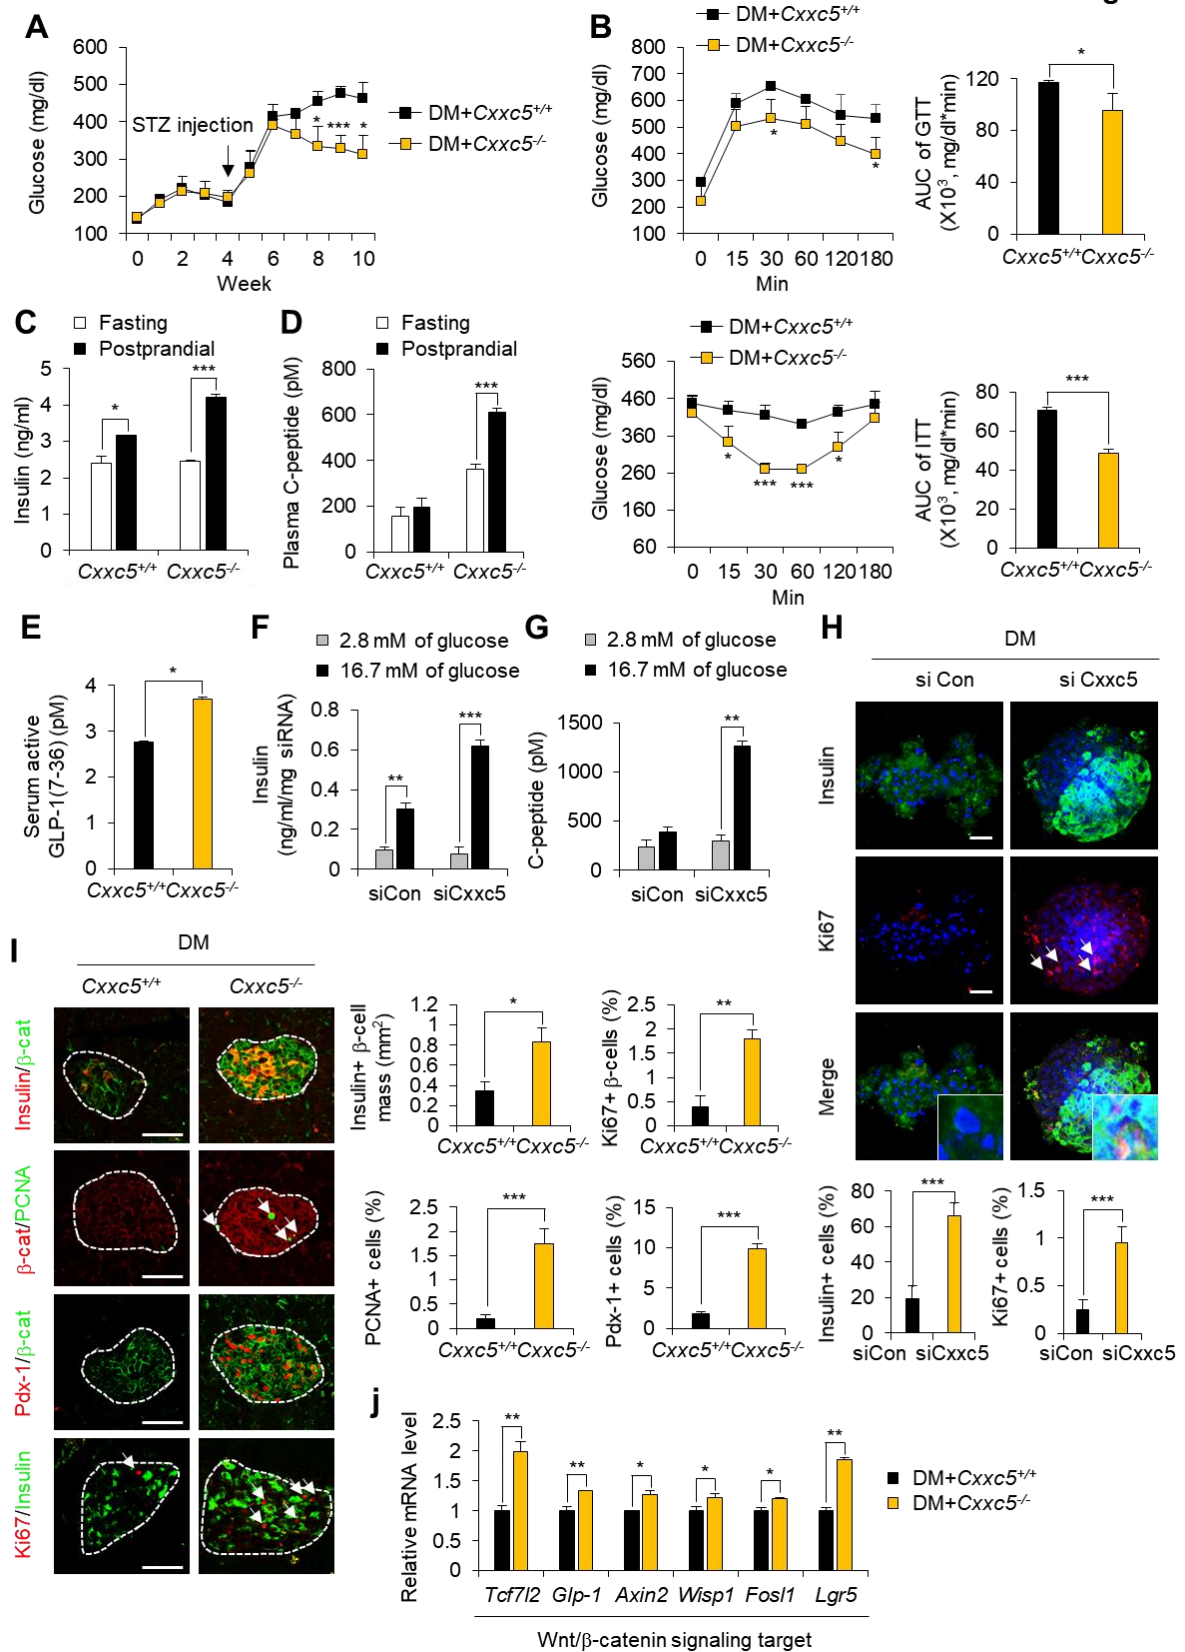

161 **Figure S9. Ablation of *Cxnc5* preserves  $\beta$ -cell mass and functions in HFD-fed and STZ-**  
162 **induced diabetes mellitus (DM) mice.** *Cxnc5*<sup>+/+</sup> and *Cxnc5*<sup>-/-</sup> mice fed HFD for 4 weeks  
163 followed by injection with STZ (50 mg/kg/d) for 1 week (*n* = 6 per group). **(A)** Non-fasting  
164 blood glucose levels. **(B)** Glucose tolerance (upper panel) and insulin tolerance tests (lower  
165 panel) and AUC. **(C-E)** Plasma concentration of insulin **(C)**, C-peptide **(D)**, and serum active  
166 GLP-1 levels **(E)**. **(F-H)** Isolated islets from the pancreas of DM-induced *Cxnc5*<sup>+/+</sup> and *Cxnc5*<sup>-/-</sup>  
167 <sup>-/-</sup> mice. For transient transfection, islets were transfected with 2 $\mu$ g of siRNA using  
168 lipofectamine in Opti-MEM. The concentration of secreted insulin **(F)** and c-peptide **(G)** from  
169 islets in response to different concentrations was measured after incubation for 1 h with either  
170 low (2.8 mM) or high (16.7 mM) glucose in KRBH buffer. **(H)** Representative images of  
171 immunofluorescent staining for insulin and Ki67 (upper panel). Quantitative analyses of insulin  
172 and Ki67 positive cells in the islets (lower panel). **(I)** Representative images of  
173 immunofluorescent staining for  $\beta$ -catenin, insulin, PCNA, Pdx-1, and Ki67 (left panel).  
174 Quantitative analyses of insulin-positive  $\beta$ -cell mass, insulin content, PCNA, Pdx-1, and Ki67  
175 positive cells in the pancreatic tissues (right panel). **(J)** Relative expression levels of mRNAs  
176 for the Wnt/ $\beta$ -catenin signaling target genes. Expression levels of mRNA were normalized by  
177 DM-induced *Cxnc5*<sup>+/+</sup> mice group. Scale bars = 100  $\mu$ m. All data are presented as the mean  $\pm$   
178 SD. \**P* < 0.05, \*\*\**P* < 0.001 determined by Student's *t*- test. DM: Diabetes mellitus.

179

180

181

182

183

Fig. S10

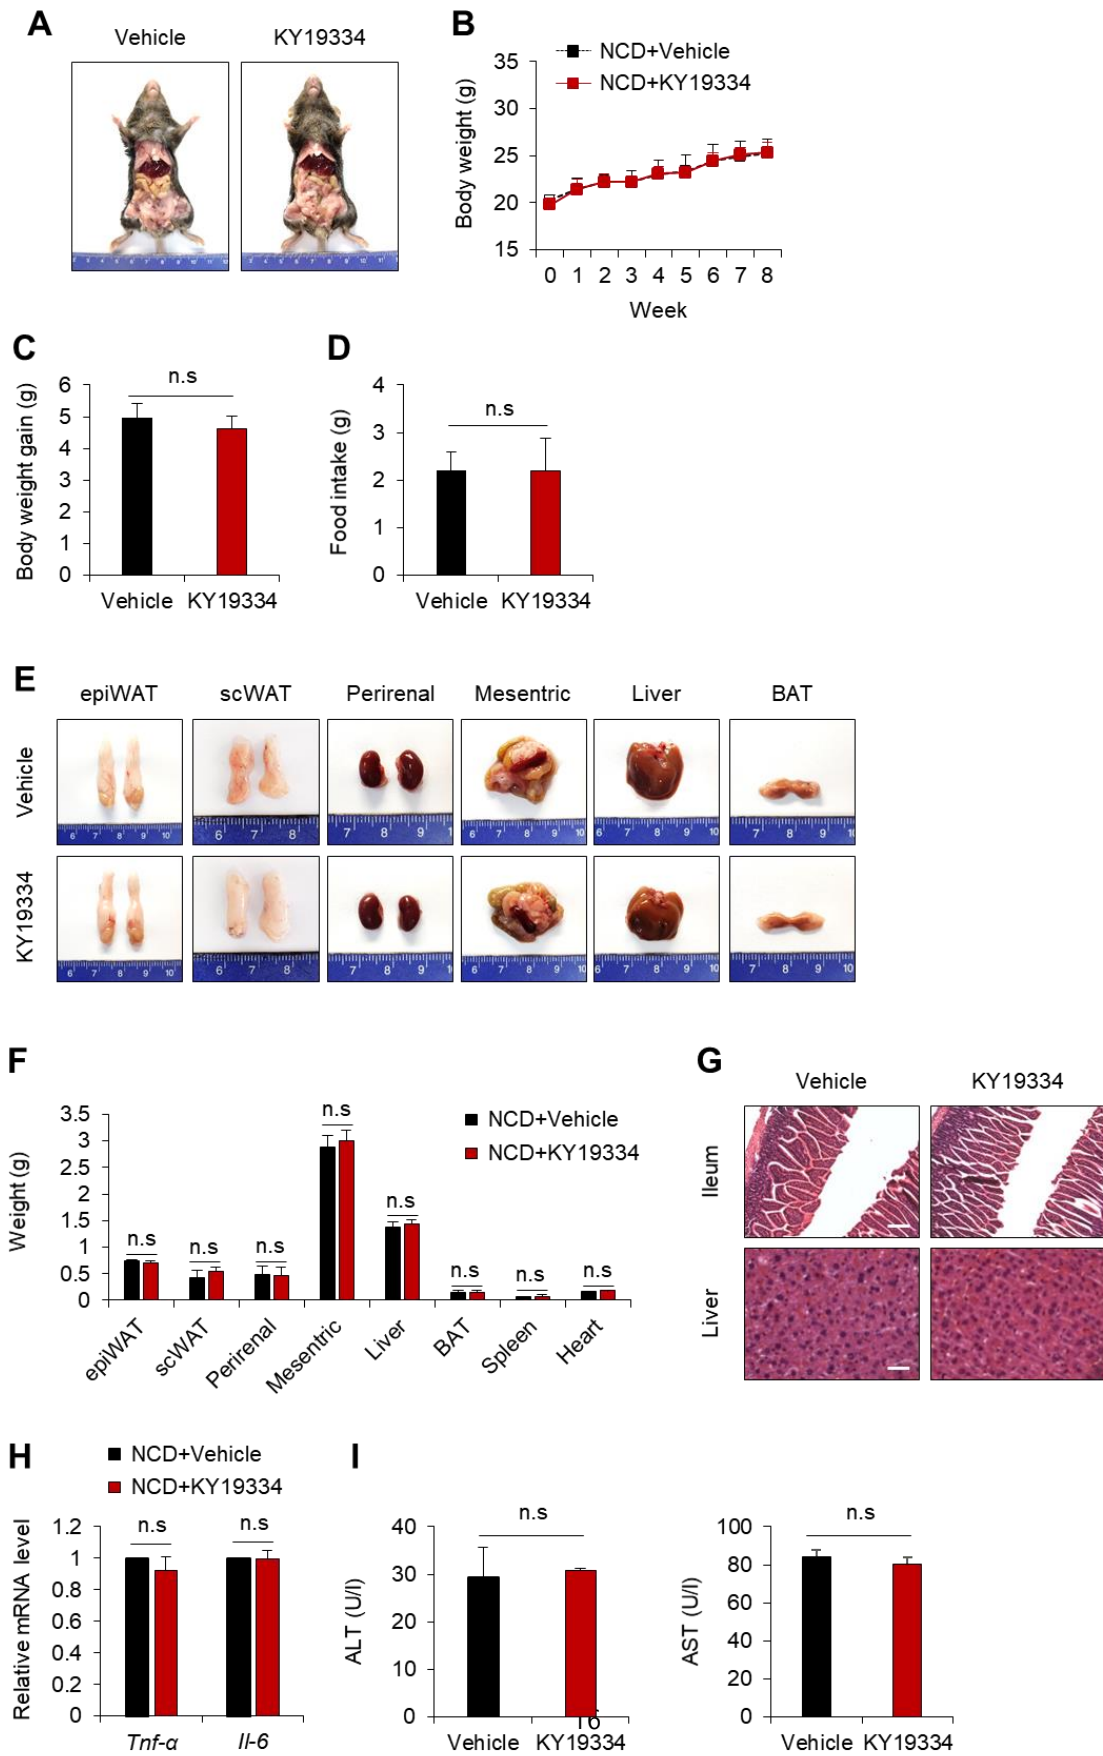



185 **Figure S10. KY19334 treatment does not show any metabolic effects in mice fed NCD.**  
186 NCD-fed C57BL/6 mice were p.o. administered KY19334 (25 mg/kg/d) for 8 weeks ( $n = 10$   
187 per group). **(A)** Representative photographs of vehicle- or KY19334-treated mice. **(B)** Body  
188 weight changes. **(C)** Body weight gain. **(D)** Food intake. **(E)** Representative photographs of fat  
189 pads (epiWAT, BAT), mesenteric, perirenal, and liver. **(F)** Wet weight of epiWAT, mesenteric,  
190 perirenal, liver, BAT, and heart. **(G)** Representative images (three total images per group) of  
191 H&E staining of ileum and liver tissue. **(H)** Relative expression levels of *Tnf- $\alpha$*  and *Il-6*.  
192 Expression levels of mRNA were normalized by NCD-fed vehicle group. **(I)** Plasma  
193 concentrations of ALT and AST. Scale bars = 100  $\mu$ m. All data are presented as the mean  $\pm$   
194 SD. n.s = non significance.

195

196

197

198

199

200

201

202

203

204

205

206

207

208

209 **Table S1. Sequences of real-time PCR primers used in this study.**

| <i>Gene</i>     | Forward                        | Reverse                        |
|-----------------|--------------------------------|--------------------------------|
| <i>Axin2</i>    | 5'-TGGAGAGTGAGCGGCAGAGC-3'     | 5'-TGGAGACGAGCGGGCAGA-3'       |
| <i>Wisp1</i>    | 5'-ATCGCCCGAGGTACGCAATAGG-3'   | 5'-CAGCCCACCGTGCCATCAATG-3'    |
| <i>Fosl1</i>    | 5'-AACCGGAGGAAGGAACTGAC-3'     | 5'-CTGCAGCCCAGATTTCTCA-3'      |
| <i>Cxhc5</i>    | 5'-CAAGAAGAAGCGGAAACGCTGC-3'   | 5'-TCTCCAGAGCAGCGGAAGGCTT-3'   |
| <i>Tcf7l2</i>   | 5'-TGTGTACCCAATCACGACAGGAG-3'  | 5'-GATTCCGGTCGTGTGCAGAG-3'     |
| <i>Tnfa</i>     | 5'-CGGAGTCCGGGCAGGT-3'         | 5'-GCTGGGTAGAGAATGGATCA-3'     |
| <i>Tgfβ1</i>    | 5'-TGACGTCACTGGAGTTGTACGG-3'   | 5'-GGTTCATGTCATGGATGGTGC-3'    |
| <i>Ifny</i>     | 5'-TCAAGTGGCATAGATGTGGAAGAA-3' | 5'-TGGCTCTGCAGGATTTTCATG-3'    |
| <i>F4/80</i>    | 5'-CTTTGGCTATGGGCTTCCAGTC-3'   | 5'-GCAAGGAGGACAGAGTTTATCGTG-3' |
| <i>Mcp1</i>     | 5'-ACTGAAGCCAGCTCTCTCTCCTC-3'  | 5'-TTCCTTCTTGGGGTCAGCACAGAC-3' |
| <i>Arg1</i>     | 5'-CTCCAAGCCAAAGTCCTTAGAG-3'   | 5'-GGAGCTGTCATTAGGGACATCA-3'   |
| <i>Chi3l3</i>   | 5'-CAGGTCTGGCAATTCTTCTGAA-3'   | 5'-GTCTTGCTCATGTGTGTAAGTGA-3'  |
| <i>Retnla</i>   | 5'-CCAATCCAGCTAACTATCCCTCC-3'  | 5'-ACCCAGTAGCAGTCATCCCA-3'     |
| <i>Pdcd1lg2</i> | 5'-TTGTCCGGTGTGATTGGCTTC-3'    | 5'-AAAAGGCAGCACACAGTTGC-3'     |
| <i>Il-10</i>    | 5'-GCTATGCTGCCTGCTCTTACT-3'    | 5'-CCTGCTGATCCTCATGCCA-3'      |
| <i>Pparδ</i>    | 5'-TCCATCGTCAACAAAGACGGG-3'    | 5'-ACTTGGGCTCAATGATGTAC-3'     |
| <i>Pparγ</i>    | 5'-TGTGGGGATAAAGCATCAGGC-3'    | 5'-CCGGCAGTTAAGATCACACCTAT-3'  |
| <i>Cecpa</i>    | 5'-GGTGGACAAGAACAGCAACGA-3'    | 5'-TGTCCAGTTCACGGCTCAGCT-3'    |
| <i>Srebp1</i>   | 5'-GGAGCCATGGATTGCACATT-3'     | 5'-GGCCCGGGAAGTCACTGT-3'       |
| <i>Fas</i>      | 5'-GCGATGAAGAGCATGGTTTAG-3'    | 5'-GGCTCAAGGGTTCCATGTT-3'      |
| <i>Scd-1</i>    | 5'-CTGTACGGGATCATACTGGTTC-3'   | 5'-GCCGTGCCTTGTAAGTTCTG-3'     |
| <i>Acc</i>      | 5'-CCTCCGTCAGCTCAGATACA-3'     | 5'-TTTACTAGGTGCAAGCCAGACA-3'   |
| <i>G6pc</i>     | 5'-GTCGTGGCTGGAGTCTTG-3'       | 5'-CGGAGGCTGGCATTGTAG-3'       |
| <i>Pepck</i>    | 5'-ATCTCCTTTGGAAGCGGATATG-3'   | 5'-CGCAACGCAAAGCATTCTT-3'      |
| <i>Pck1</i>     | 5'-GGTATTGAACTGACAGACTC-3'     | 5'-CCAGTTGTTGACCAAAGG-3'       |
| <i>Fbp1</i>     | 5'-GTAACATCTACAGCCTTAATGAG-3'  | 5'-CCAGAGTGCGGTGAATATC-3'      |

|               |                              |                               |
|---------------|------------------------------|-------------------------------|
| <i>Ucp1</i>   | 5'-AGGCTTCCAGTACCATTAGGT-3'  | 5'-CTGAGTGAGGCAAAGCTGATTT-3'  |
| <i>Pgc-1α</i> | 5'-AGCCGTGACCACTGACAACGAG-3' | 5'-GCTGCATGGTTCTGAGTGCTAAG-3' |
| <i>Prdm16</i> | 5'-CCACCAGCGAGGACTTCAC-3'    | 5'-GGAGGACTCTCGTAGCTCGAA-3'   |
| <i>Elovl3</i> | 5'-TTCTCACGCGGGTTAAAAATGG-3' | 5'-GAGCAACAGATAGACGACCAC-3'   |
| <i>Cox8b</i>  | 5'-GAACCATGAAGCCAACGACT-3'   | 5'-GCGAAGTTCACAGTGGTTCC-3'    |
| <i>Cd137</i>  | 5'-CCTTGCAGGTCCTTACCTTGT-3'  | 5'-GTTGCTTGAATATGTGGGGGA-3'   |
| <i>Tmem26</i> | 5'-ATGGTGCATTTCAAGAAGCC-3'   | 5'-GCTCACCTCAAGTTCAAGC-3'     |
| <i>Tbx1</i>   | 5'-CTGTGGGACGAGTTCAATCAG-3'  | 5'-TTGTCATCTACGGGCACAAAG      |

210
